# Supplementary material for: 3D nanoplasmonic biosensor for detection of filopodia in cells
Source: Royal Society of Chemistry journal article supplement (doi:10.1039/d0lc00173b), 2020-01-01
Supplement: d0lc00173b1.pdf [file d0lc00173b1.pdf]

## Supplementary Figures

### 3D Nanoplasmonic Biosensor for Detection of Filopodia in Cells

Shuyan ZHU,<sup>a,b</sup> M. A. Eldeeb,<sup>a,b</sup> and Stella W. Pang<sup>a,b\*</sup>

<sup>a</sup> Department of Electrical Engineering, City University of Hong Kong, Kowloon, Hong Kong

<sup>b</sup> Centre for Biosystems, Neuroscience, and Nanotechnology, City University of Hong Kong, Kowloon, Hong Kong

### SU-8 Nanopillars with Sloped Sidewalls after Demolding at Angle

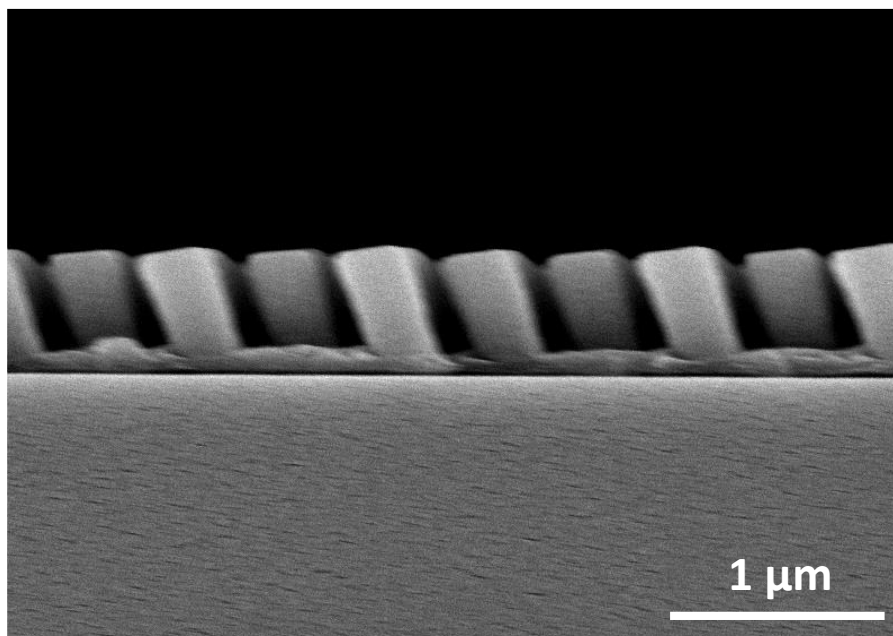

**Supplementary Figure 1.** Micrograph of SU-8 nanopillars with sloped sidewalls on Si after demolding at angle.

**Microposts on Nanopillars  
with Vertical Sidewall**

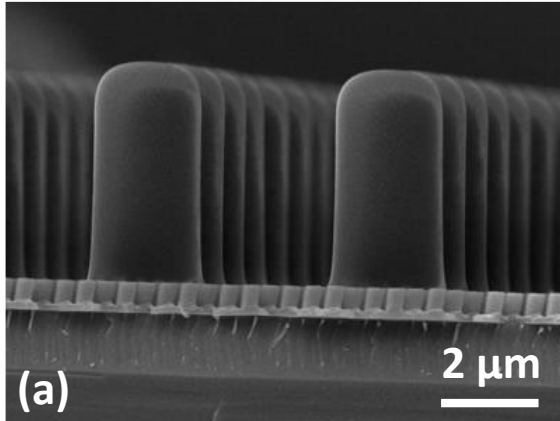

**Microposts on Nanopillars  
with Sloped Sidewall**

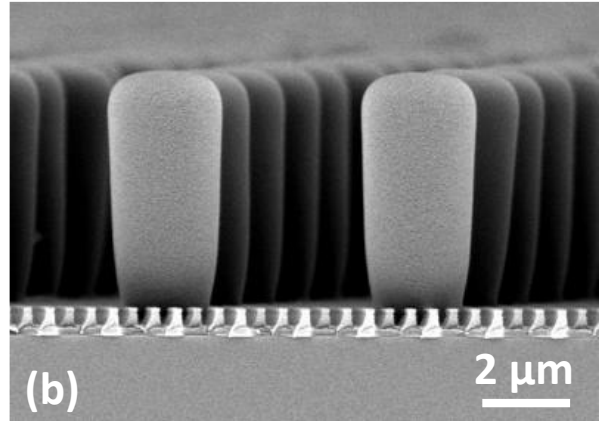

**Supplementary Figure 2.** Micrographs of microposts (2.2  $\mu\text{m}$  dia., 3.2  $\mu\text{m}$  gap, 5  $\mu\text{m}$  depth) on plasmonic nanopillars with (a) vertical (280 nm width, 535 nm pitch, 500 nm depth) and (b) sloped (200 nm on top, 280 nm on bottom, 64° slope, 535 nm pitch, 360 nm depth) sidewalls.

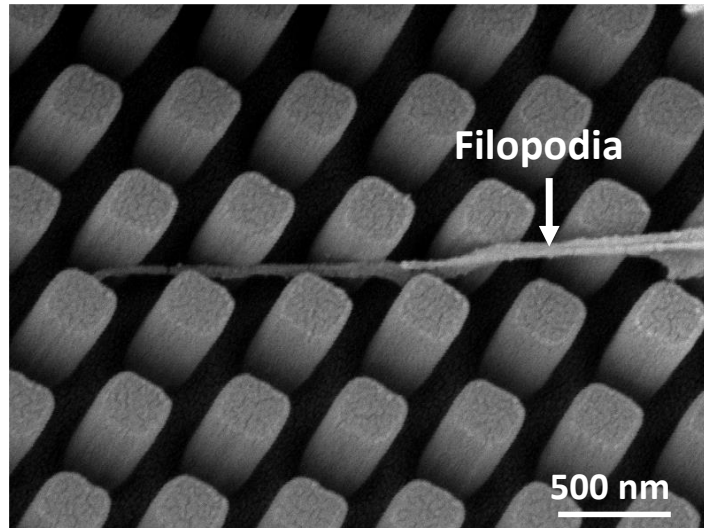

**Supplementary Figure 3.** Micrograph of filopodia extended to the sidewall and bottom surface of nanopillars with 280 nm width, 535 nm pitch, and 500 nm depth.
